# Supplementary material for: Genome-Wide Analysis Reveals Selection for Important Traits in Domestic Horse Breeds
Source: PubMed Central journal article supplement (PMC3547851; doi:10.1371/journal.pgen.1003211), 2013-01-17
Supplement: pgen.1003211.s001.pdf [file pgen.1003211.s001.pdf]

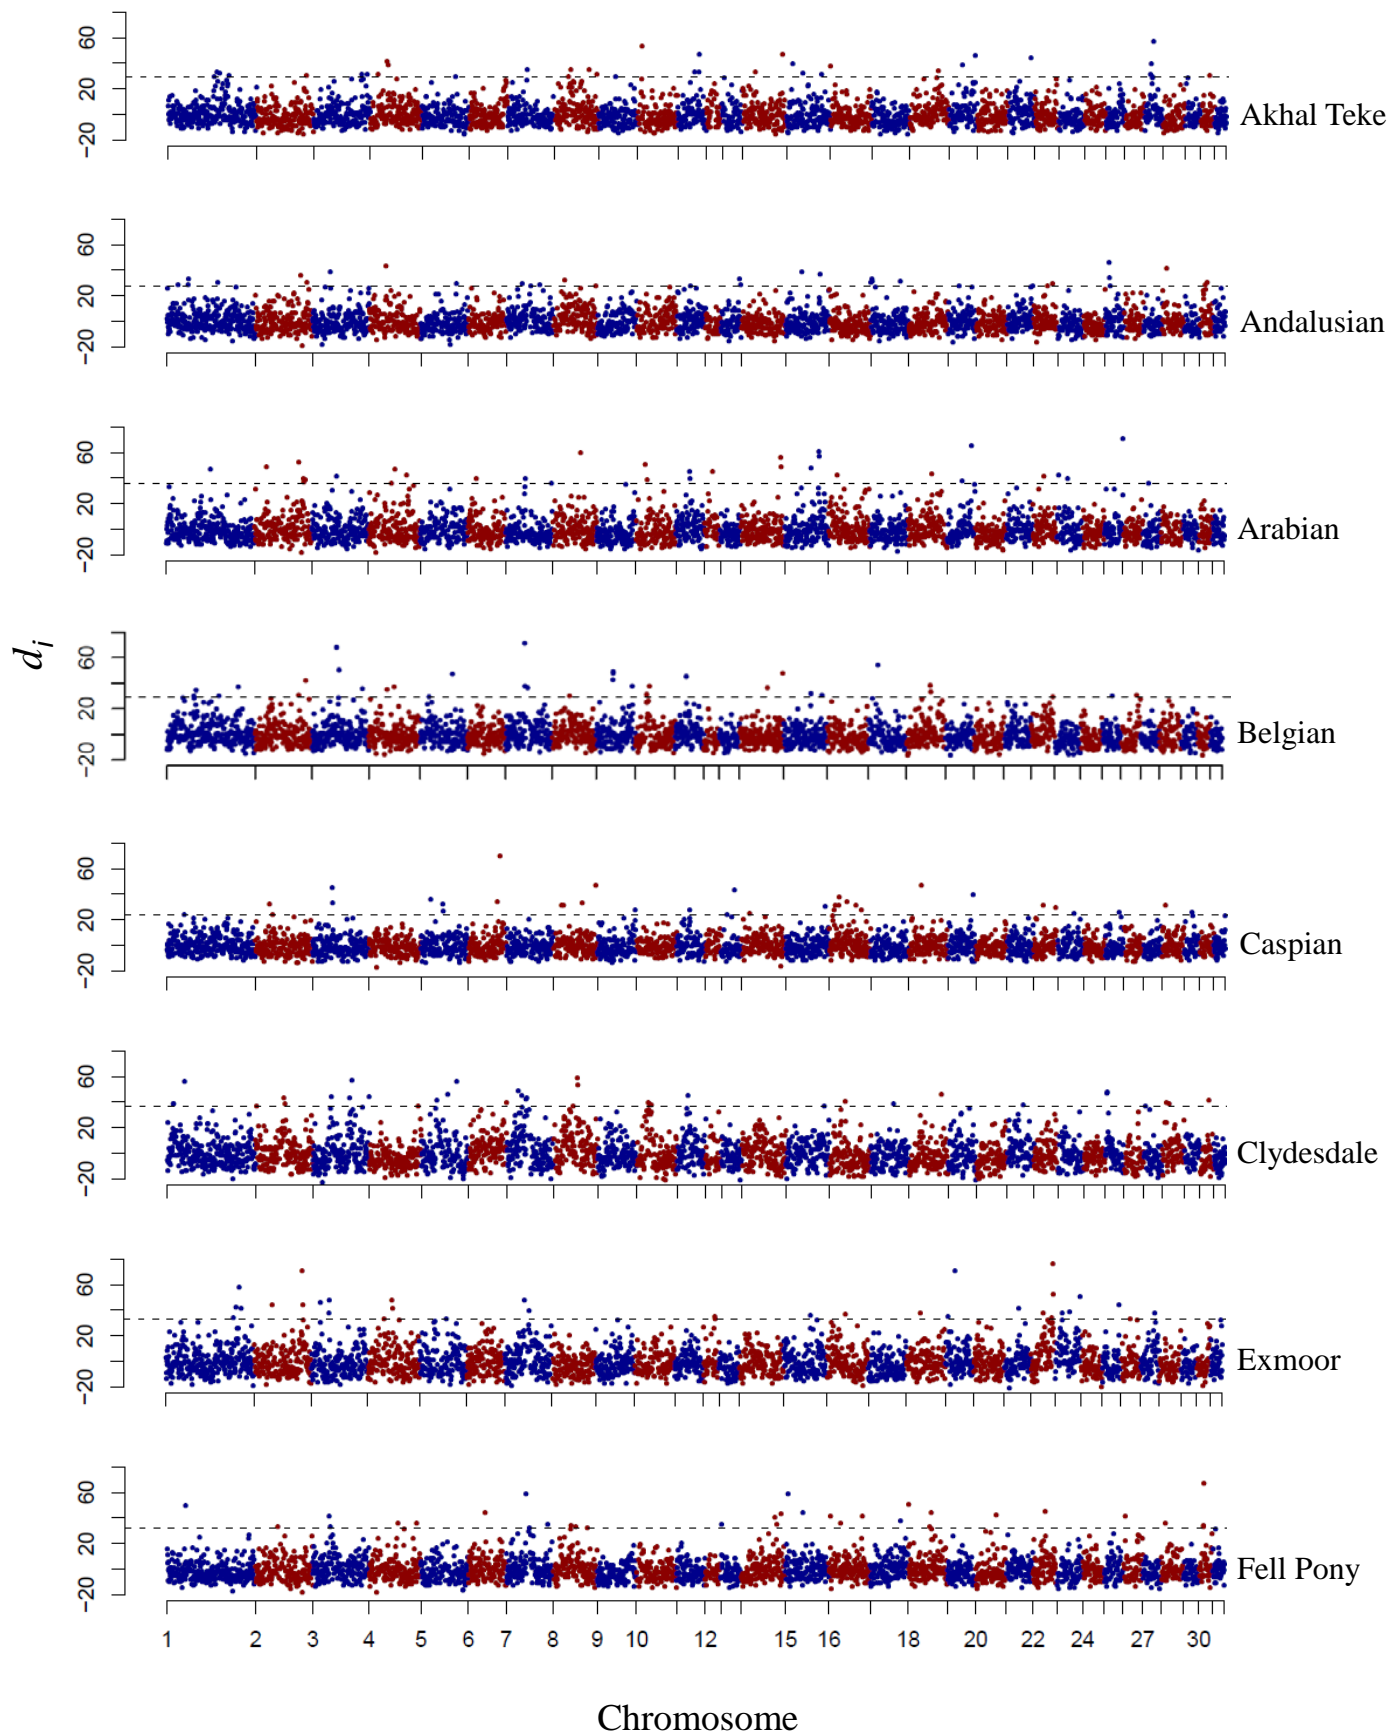

Figure S1

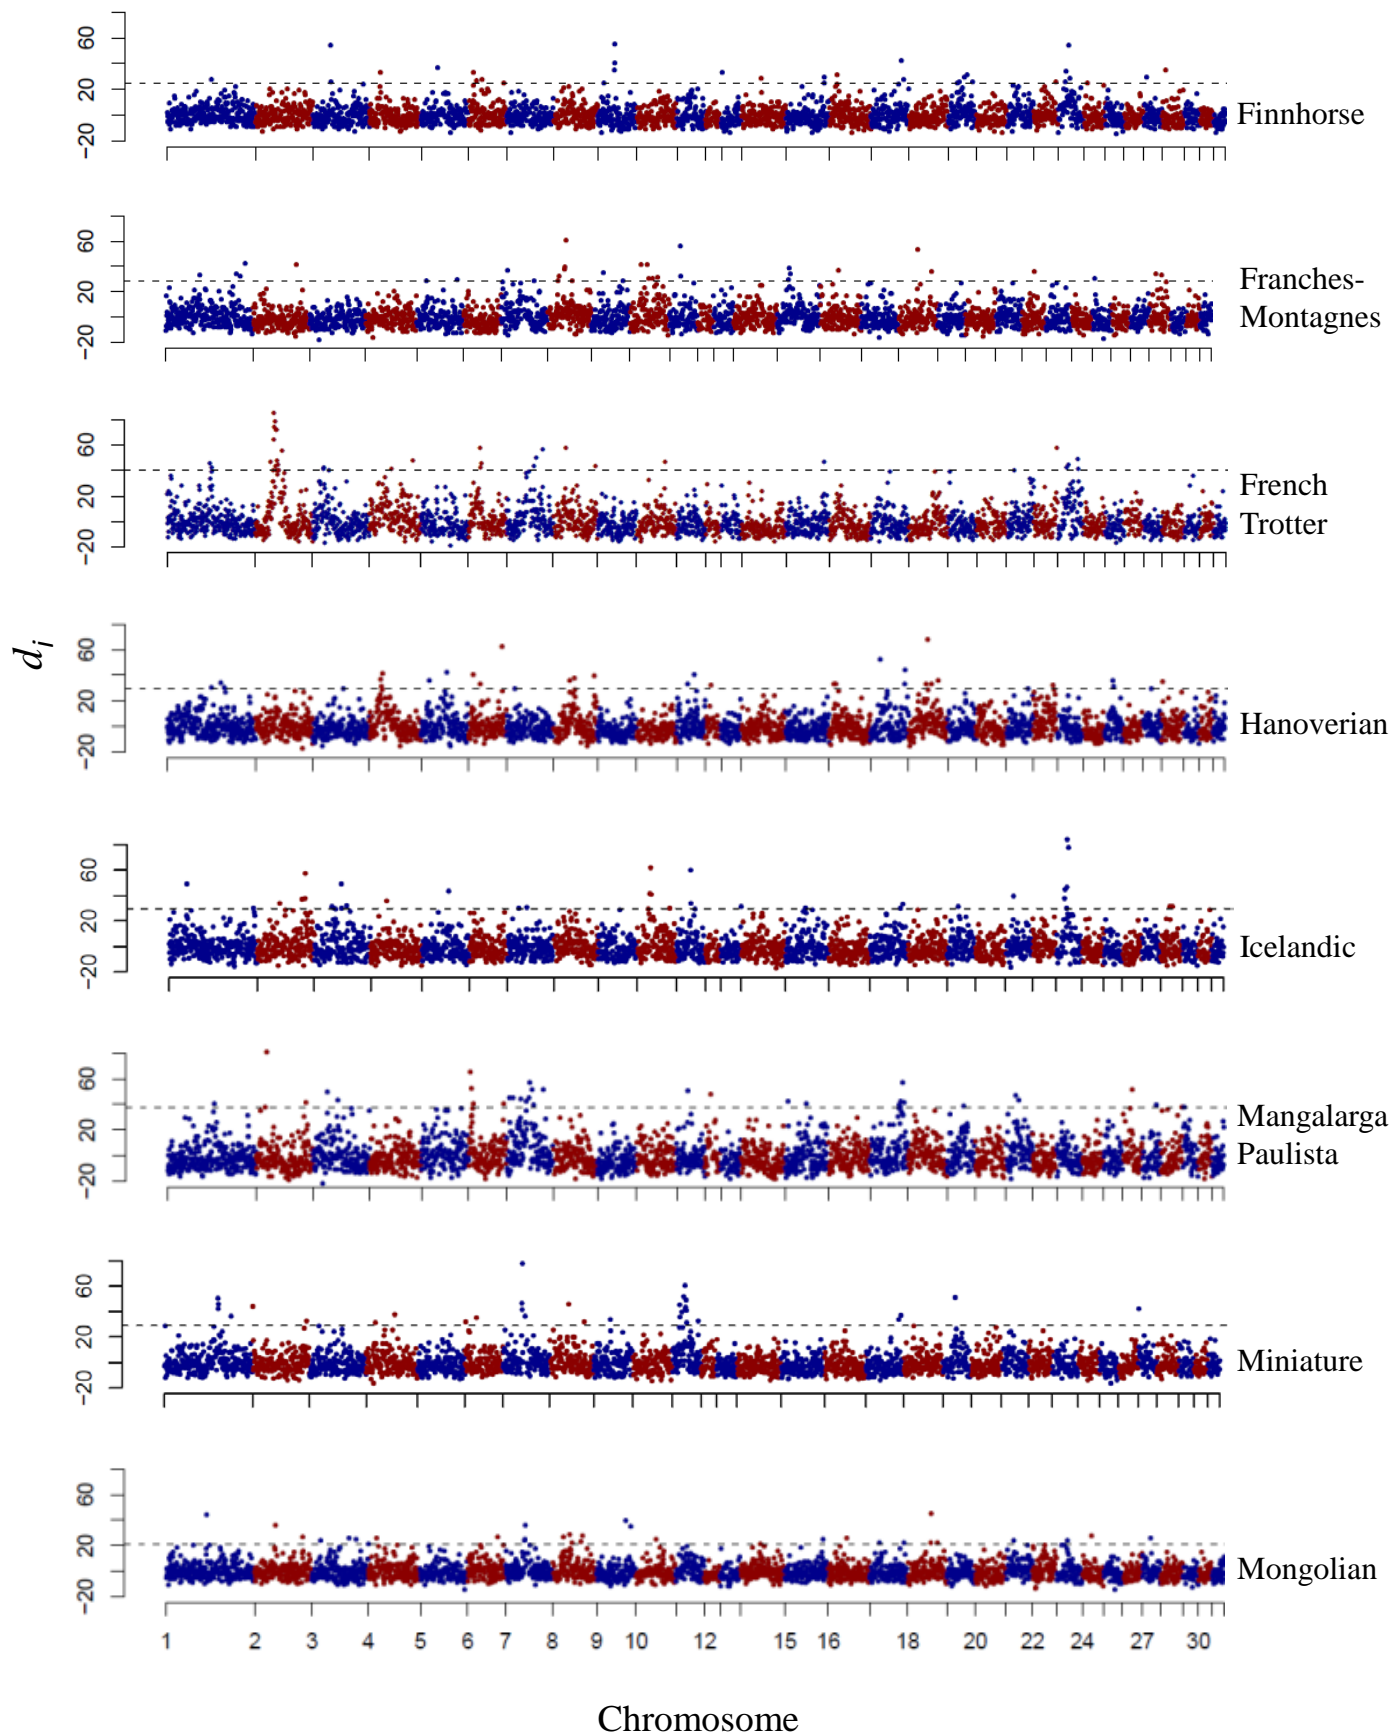

Figure S1 (cont)

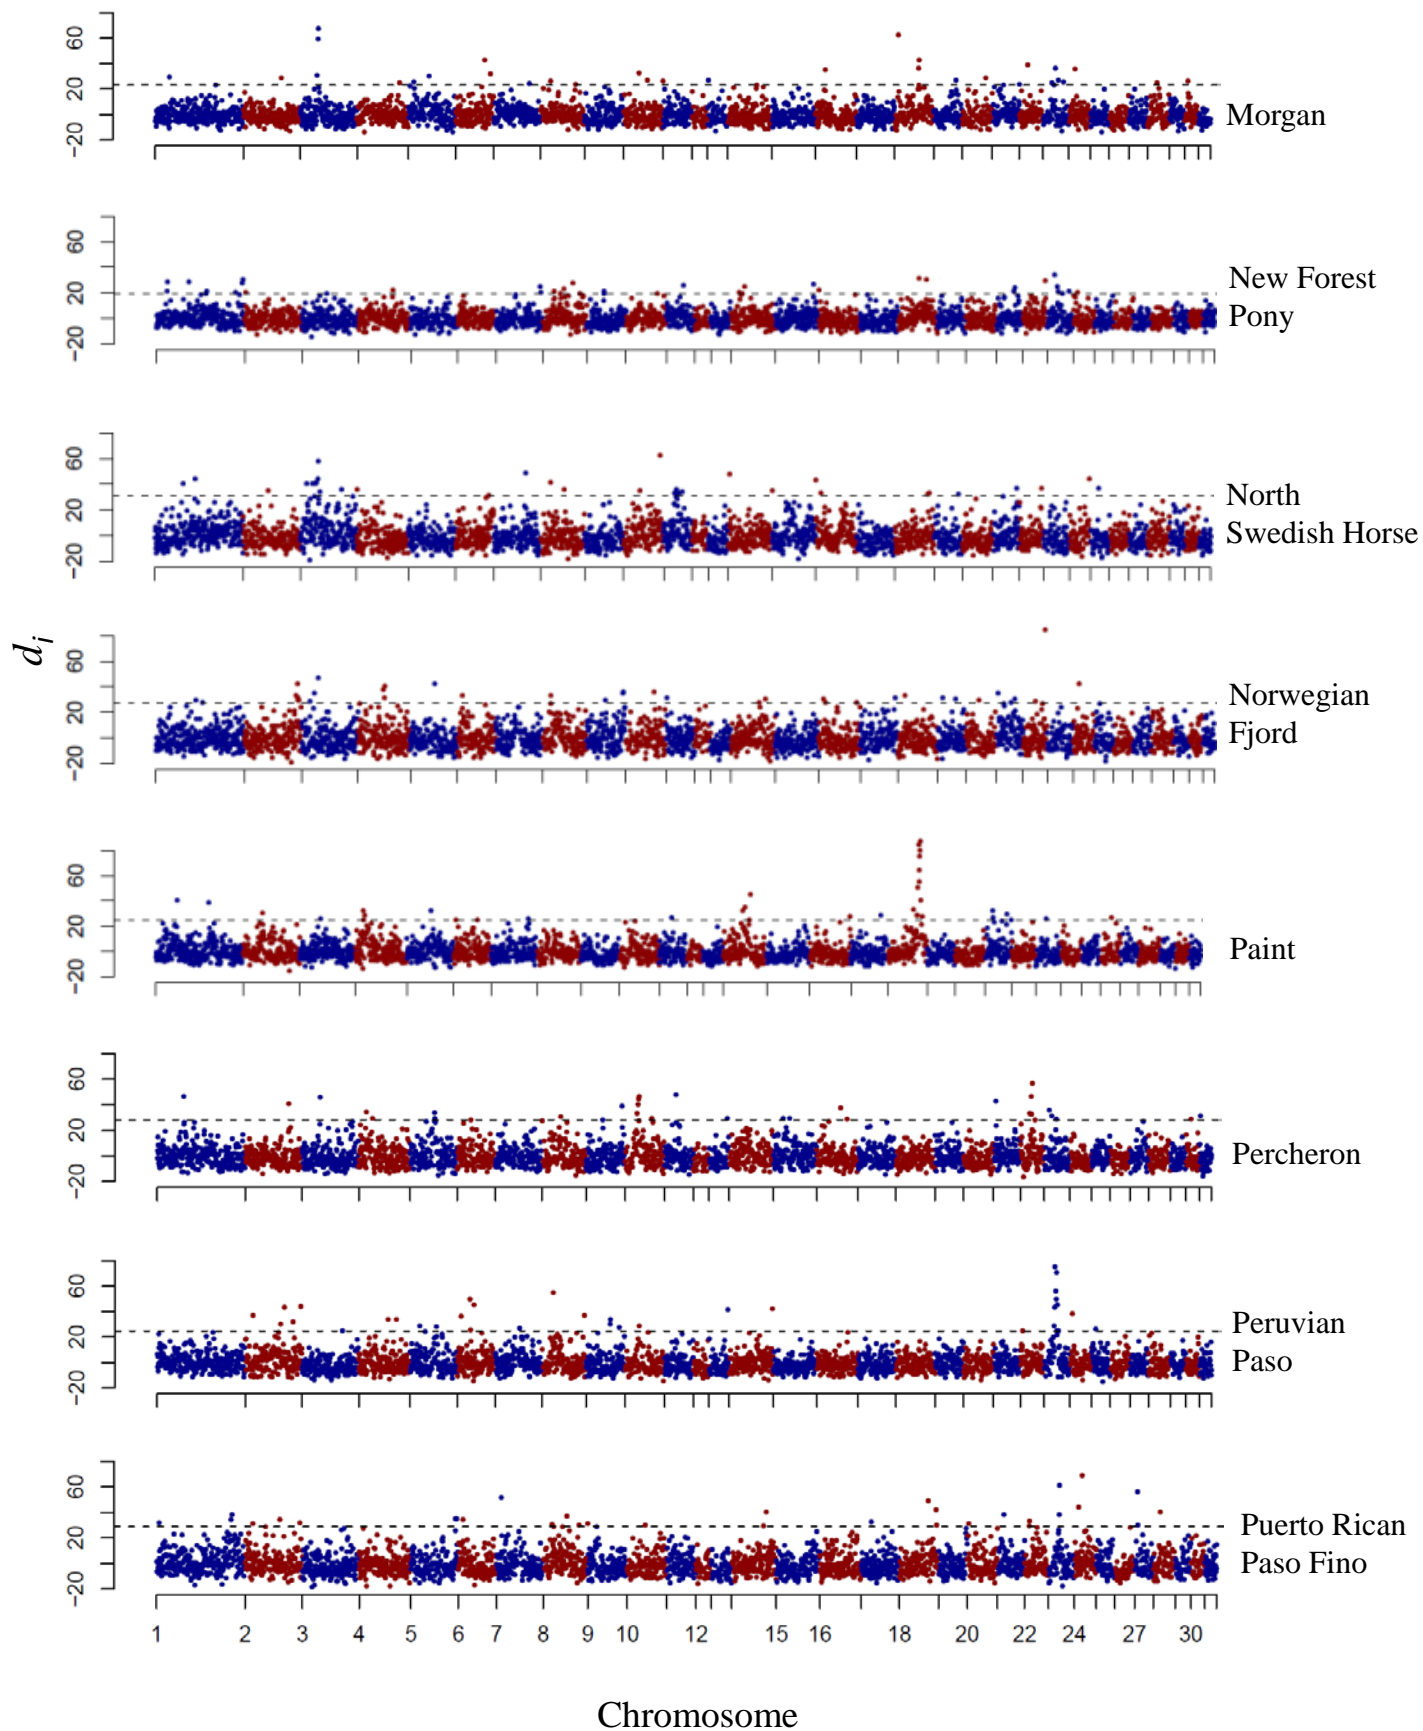

Figure S1 (cont)

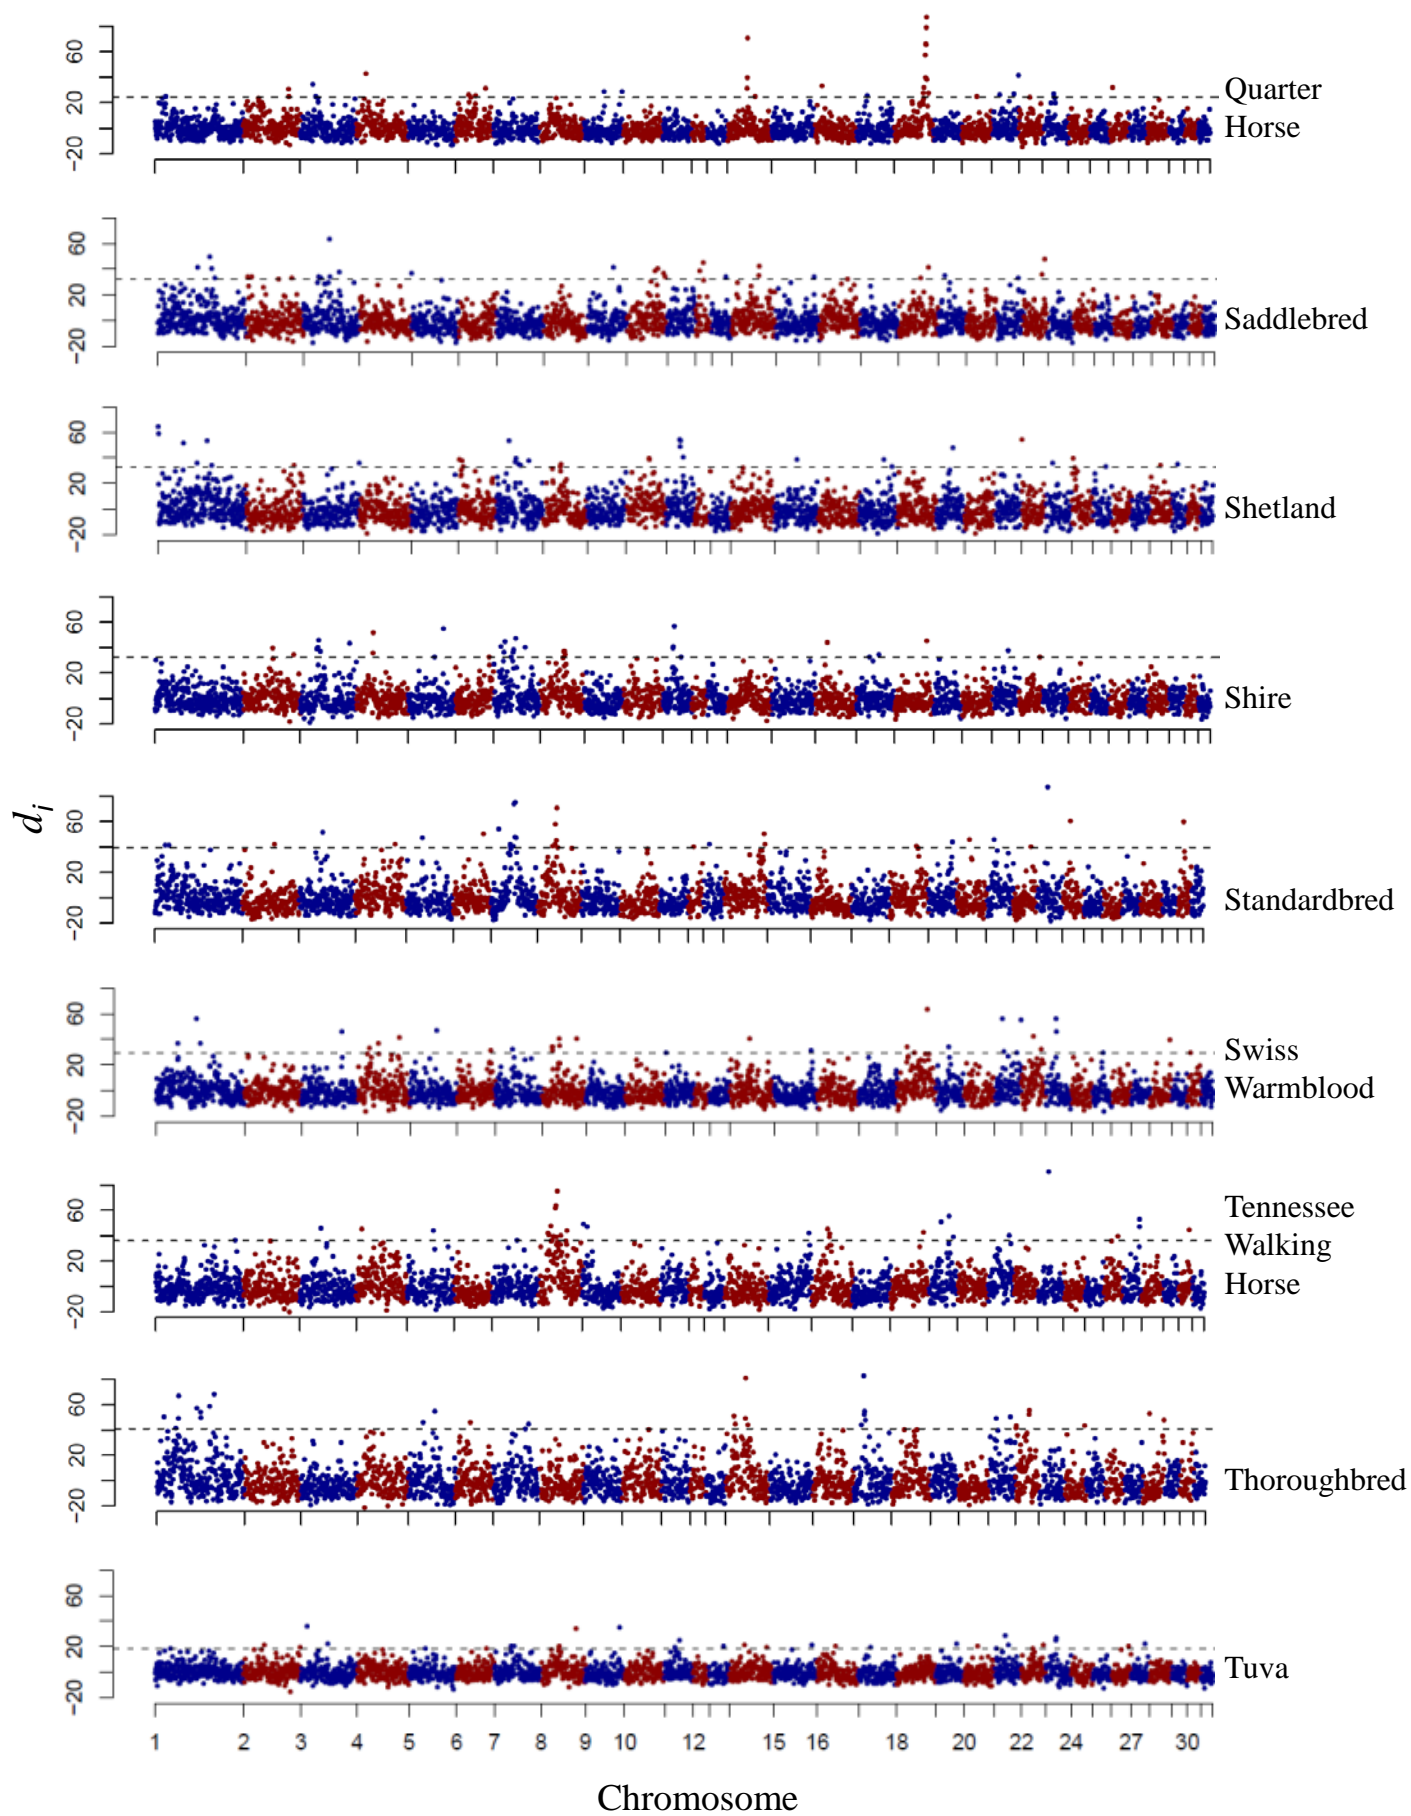

Figure S1 (cont)
