# Supplementary material for: Genome-Wide Analysis Reveals Selection for Important Traits in Domestic Horse Breeds
Source: PubMed Central journal article supplement (PMC3547851; doi:10.1371/journal.pgen.1003211), 2013-01-17
Supplement: pgen.1003211.s002.pdf [file pgen.1003211.s002.pdf]

Table S1. Genomic coordinate (chr:bp position) of the center of the thirty-three, 500 kb windows for each breed that fell into the 99th percentile of the empirical distribution and were therefore designated putative signatures of selection.

| <b>Akhal Teke</b> | <b>Andalusian</b> | <b>Arabian</b> | <b>Belgian</b> | <b>Caspian</b> | <b>Clydesdale</b> | <b>Exmoor</b> | <b>Fell Pony</b> | <b>Finnhorse</b> | <b>Franches-Montagnes</b> | <b>French Trotter</b> | <b>Hanoverian</b> |
|-------------------|-------------------|----------------|----------------|----------------|-------------------|---------------|------------------|------------------|---------------------------|-----------------------|-------------------|
| 1:102205365       | 1:23640081        | 1:92836057     | 1:56275202     | 2:29253849     | 1:12388338        | 1:141559392   | 1:39086285       | 1:92836057       | 1:72405297                | 1:89811759            | 1:92836057        |
| 1:108046292       | 1:44081127        | 2:25127188     | 1:61042512     | 3:41277613     | 1:13300410        | 1:147244029   | 2:47117074       | 3:37227339       | 1:149562024               | 1:92836057            | 1:112002398       |
| 1:127515479       | 1:45436375        | 2:92601193     | 1:109128149    | 3:41817820     | 1:36608664        | 1:153764548   | 3:34693396       | 3:37825015       | 1:157982592               | 2:31443015            | 1:119869331       |
| 2:104382151       | 1:106556331       | 2:102159442    | 1:149562024    | 5:20095922     | 2:58779951        | 1:157982592   | 3:37227339       | 4:22195106       | 1:168185744               | 2:36737292            | 3:63431764        |
| 3:100758100       | 2:94562412        | 2:103189105    | 2:91540894     | 5:45801283     | 2:61771790        | 2:37400190    | 4:60073037       | 5:33930869       | 2:91540894                | 2:38035768            | 4:23652911        |
| 3:111688033       | 2:108185771       | 2:106334223    | 2:106334223    | 5:46315160     | 3:38887583        | 2:100939871   | 4:99303086       | 6:10357668       | 5:20095922                | 2:38568800            | 4:24941104        |
| 4:15905004        | 3:37227339        | 3:51378517     | 3:51378517     | 6:60792087     | 3:76875704        | 2:102159442   | 6:35073502       | 6:16664747       | 5:85615336                | 2:39208463            | 4:27612875        |
| 4:34698424        | 4:34698424        | 4:48013130     | 3:55999074     | 6:66491461     | 3:81433325        | 3:19366645    | 7:40960230       | 6:27986271       | 7:13365816                | 2:40944330            | 5:17279565        |
| 4:37485250        | 5:73870324        | 4:55449773     | 3:105296433    | 8:18042600     | 3:117494114       | 3:37227339    | 7:48559708       | 6:74063729       | 7:69868336                | 2:42017895            | 5:53448662        |
| 7:40960230        | 7:33179993        | 4:79278889     | 4:38643266     | 8:21733196     | 5:32288780        | 3:37825015    | 7:86691256       | 9:12517775       | 8:24825032                | 2:42807353            | 6:9835865         |
| 8:29937334        | 7:51296996        | 6:17915950     | 4:52904192     | 8:60493821     | 5:55356763        | 4:34167967    | 8:38106902       | 9:34746009       | 8:36207838                | 2:43598118            | 6:24431261        |
| 8:34422420        | 7:69868336        | 7:40960230     | 5:67481669     | 8:89332508     | 5:73870324        | 4:49990964    | 8:48202501       | 9:35267151       | 8:37578060                | 2:45313577            | 6:70476841        |
| 8:73086390        | 8:24042907        | 7:95622851     | 7:40438669     | 9:78385433     | 6:79654496        | 4:51700499    | 8:72001104       | 9:35770488       | 8:39900313                | 2:47117074            | 7:17854992        |
| 8:89332508        | 8:89332508        | 8:59414786     | 7:40960230     | 11:27613048    | 7:24355732        | 7:40960230    | 13:2125006       | 13:1485739       | 8:52633213                | 2:55811541            | 8:35038729        |
| 10:8754201        | 11:28876865       | 10:19697977    | 7:46968011     | 13:12323238    | 7:31540712        | 7:51296996    | 14:71509062      | 14:41103285      | 9:25700888                | 3:22458450            | 8:44659359        |
| 11:35369931       | 13:38114438       | 10:23368490    | 8:36795471     | 13:27516469    | 7:40438669        | 12:23894923   | 14:75466822      | 15:79818862      | 9:67551981                | 3:23024232            | 8:86484425        |
| 11:44352630       | 13:40719638       | 11:28876865    | 9:34746009     | 14:17198854    | 7:42049089        | 12:24558133   | 14:84316340      | 15:80344415      | 10:23368490               | 4:46225658            | 11:23368264       |
| 11:45369127       | 15:33815370       | 11:29807882    | 9:35267151     | 15:82734531    | 8:50256747        | 15:56763560   | 15:6093107       | 16:15597151      | 10:36688602               | 4:90614058            | 11:37097420       |
| 14:27471476       | 15:71838357       | 12:16350337    | 9:35770488     | 16:10561202    | 8:51469702        | 16:38638668   | 15:37118954      | 17:63935482      | 10:39702064               | 6:24431261            | 12:11315127       |
| 14:84316340       | 17:405794         | 14:84316340    | 9:75629414     | 16:12731434    | 10:23368490       | 18:29788020   | 16:3794646       | 17:68372837      | 10:48168671               | 6:24969195            | 16:9829538        |
| 15:12291831       | 17:2593346        | 14:84851388    | 10:23878569    | 16:19826261    | 10:25915951       | 19:5339359    | 16:25260737      | 19:19251143      | 10:58572911               | 6:26812978            | 16:14435298       |
| 15:33815370       | 17:3804958        | 15:54483062    | 10:29745226    | 16:20893690    | 10:29745226       | 19:19838968   | 16:70616677      | 19:23655565      | 11:23368264               | 7:57684414            | 17:20940428       |
| 15:72376768       | 17:62200185       | 15:71300260    | 11:23368264    | 16:36982279    | 11:23368264       | 21:31220248   | 17:63935482      | 19:33880762      | 11:23962785               | 7:62338267            | 17:71982798       |
| 16:317350         | 19:23655565       | 15:71838357    | 14:58562422    | 16:55578137    | 15:79818862       | 22:25127024   | 18:1442565       | 19:39554002      | 15:23732407               | 7:75303090            | 17:72689827       |
| 18:59434778       | 21:54483816       | 16:18584682    | 14:90884366    | 16:67207691    | 16:32998762       | 22:43700089   | 18:45414883      | 19:50757787      | 15:25512766               | 8:26215436            | 18:37019276       |
| 19:28039051       | 22:28689582       | 18:50224866    | 15:56763560    | 18:26093099    | 17:47213263       | 22:45933595   | 18:48410000      | 22:45933595      | 15:27792702               | 8:88179706            | 18:39860166       |
| 19:55501735       | 22:39401137       | 19:31871988    | 15:79818862    | 19:52546471    | 18:67707777       | 22:46560215   | 20:43187121      | 23:15502235      | 16:38638668               | 10:58572911           | 18:48410000       |
| 21:48843586       | 25:8443219        | 19:50757787    | 17:19631092    | 22:19687846    | 21:33947822       | 23:15502235   | 22:25127024      | 23:17350602      | 18:39860166               | 15:79818862           | 18:61908546       |
| 27:12251424       | 25:9080525        | 22:22992993    | 18:50224866    | 22:45933595    | 25:3045502        | 23:31197997   | 26:4469593       | 23:23217656      | 18:69579598               | 22:47752594           | 22:41246919       |
| 27:14014475       | 25:10338312       | 23:4189055     | 18:51459337    | 23:34366418    | 25:4078681        | 23:53707286   | 28:8264904       | 23:25957521      | 22:25127024               | 23:19119210           | 25:16939693       |
| 27:16219387       | 28:9537681        | 23:23217656    | 22:45933595    | 25:29076304    | 28:8264904        | 25:34819390   | 30:9533798       | 24:7931933       | 25:4078681                | 23:23217656           | 25:18498415       |
| 27:18824484       | 30:11190107       | 25:38707363    | 25:21004886    | 28:6685277     | 28:14519521       | 26:19464438   | 30:10068990      | 27:6160085       | 28:14519521               | 23:42594802           | 27:17481989       |
| 30:19018060       | 30:15694650       | 27:12251424    | 26:33380395    | 29:16890937    | 30:19018060       | 27:29563839   | 30:10642643      | 28:6685277       | 28:26405894               | 23:43177154           | 28:1923754        |

Table S1. (continued)

| <b>Icelandic</b> | <b>Mangalarga<br/>Paulista</b> | <b>Miniature</b> | <b>Mongolian</b> | <b>Morgan</b> | <b>New Forest<br/>Pony</b> | <b>N Swedish<br/>Horse</b> | <b>Norwegian<br/>Fjord</b> | <b>Paint</b> | <b>Percheron</b> | <b>Peruvian<br/>Paso</b> | <b>Puerto Rican<br/>Paso Fino</b> |
|------------------|--------------------------------|------------------|------------------|---------------|----------------------------|----------------------------|----------------------------|--------------|------------------|--------------------------|-----------------------------------|
| 1:37324605       | 1:97430737                     | 1:112620338      | 1:84592286       | 1:29790268    | 1:22591693                 | 1:59171841                 | 1:83401452                 | 1:45436375   | 1:55738341       | 2:16329197               | 1:5396146                         |
| 2:47117074       | 2:19392863                     | 1:113120360      | 2:43598118       | 2:79654345    | 1:23134761                 | 1:84592286                 | 2:108185771                | 1:112002398  | 2:91540894       | 2:74596559               | 1:155993552                       |
| 2:93940340       | 2:22531694                     | 1:113762369      | 2:100939871      | 3:34693396    | 1:68031374                 | 2:52334217                 | 2:111149048                | 2:40944330   | 3:37825015       | 2:82375270               | 1:157982592                       |
| 2:100398489      | 2:105089931                    | 1:140106731      | 3:18223786       | 3:37227339    | 1:106044781                | 3:13394607                 | 2:111780939                | 3:44177551   | 4:15905004       | 2:100398489              | 2:16329197                        |
| 2:100939871      | 3:29709788                     | 2:603214         | 3:77717733       | 3:37825015    | 1:165827630                | 3:25354240                 | 2:112375252                | 4:15905004   | 4:28633487       | 2:116890360              | 2:72613378                        |
| 3:37227339       | 3:51378517                     | 2:113483601      | 3:92196729       | 4:89217074    | 1:180236201                | 3:32287917                 | 2:113483601                | 4:19440415   | 5:51188041       | 4:61764751               | 2:114717325                       |
| 3:38887583       | 6:3459778                      | 3:19366645       | 3:118774879      | 5:11065032    | 1:181412324                | 3:33592732                 | 3:16977190                 | 5:51749985   | 5:51749985       | 4:79278889               | 5:92753075                        |
| 3:56554326       | 6:5615358                      | 4:19440415       | 4:16838125       | 5:43223929    | 2:1529200                  | 3:37227339                 | 3:26513793                 | 6:5029673    | 6:27986271       | 5:20095922               | 5:96105824                        |
| 3:57070466       | 6:9835865                      | 4:60073037       | 6:63433016       | 6:60792087    | 3:51378517                 | 3:37825015                 | 3:34121799                 | 7:79156111   | 8:39900313       | 5:55356763               | 6:9335376                         |
| 3:67746361       | 6:74063729                     | 6:1888178        | 7:39895983       | 6:72896366    | 4:71237056                 | 3:41277613                 | 4:51700499                 | 11:26280083  | 9:34746009       | 6:7703943                | 7:10116916                        |
| 4:33614358       | 7:6533266                      | 6:24431261       | 7:40438669       | 7:75303090    | 7:92929452                 | 3:86939273                 | 4:54252853                 | 14:42397287  | 9:75629414       | 6:26812978               | 8:18620247                        |
| 5:55978630       | 7:13365816                     | 7:39895983       | 7:40960230       | 8:21733196    | 7:94492973                 | 4:262417                   | 4:55449773                 | 14:47063931  | 10:25107856      | 6:27427166               | 8:21733196                        |
| 7:24355732       | 7:29540215                     | 7:40438669       | 8:23497931       | 8:74125185    | 8:24042907                 | 6:69907347                 | 5:51749985                 | 14:58041782  | 10:27236368      | 6:35073502               | 8:49718815                        |
| 7:40960230       | 7:40960230                     | 7:40960230       | 8:36795471       | 10:32110637   | 8:44659359                 | 7:67748458                 | 6:9835865                  | 16:85408245  | 10:28629007      | 7:51296996               | 8:74657508                        |
| 10:26694526      | 7:46968011                     | 7:46968011       | 8:41601829       | 10:50046869   | 8:62906066                 | 8:21733196                 | 8:17538265                 | 17:63935482  | 10:29745226      | 8:24042907               | 8:93009642                        |
| 10:28629007      | 7:48559708                     | 8:40405825       | 8:59972319       | 10:82894401   | 9:35267151                 | 8:50256747                 | 9:38904743                 | 18:53250187  | 10:56330822      | 8:89332508               | 10:37763499                       |
| 10:29745226      | 7:53351032                     | 8:73086390       | 8:62906066       | 13:1485739    | 11:36580369                | 10:33702093                | 9:75629414                 | 18:60847205  | 11:23368264      | 9:50848697               | 14:66349082                       |
| 11:28876865      | 7:57128127                     | 9:34746009       | 9:60733866       | 16:20893690   | 14:17198854                | 10:76834121                | 9:76247079                 | 18:61357327  | 13:38114438      | 9:51349001               | 14:72054197                       |
| 11:29807882      | 7:77535387                     | 11:15059581      | 9:71109944       | 18:7923773    | 14:23773621                | 11:23368264                | 10:58572911                | 18:61908546  | 15:20471150      | 9:69897250               | 17:20940428                       |
| 13:42104652      | 11:23962785                    | 11:15693225      | 10:42463983      | 18:50224866   | 14:28679683                | 11:27613048                | 11:2359201                 | 18:64627397  | 15:33815370      | 10:29745226              | 18:60097420                       |
| 15:42081492      | 12:11315127                    | 11:19793962      | 14:42397287      | 18:51459337   | 15:79818862                | 11:32050443                | 14:72584360                | 18:65193195  | 16:50035128      | 13:39404679              | 18:76882666                       |
| 17:63935482      | 15:6093107                     | 11:23368264      | 15:79818862      | 19:46405131   | 16:317350                  | 11:39893389                | 16:9829538                 | 18:65815128  | 16:63806037      | 14:90884366              | 18:78015497                       |
| 17:68938330      | 15:44118290                    | 11:26280083      | 16:38638668      | 20:49599056   | 18:43168007                | 14:3628884                 | 16:14435298                | 18:66328922  | 21:5048077       | 22:4388064               | 20:3277417                        |
| 19:23122597      | 17:61049478                    | 11:27025732      | 17:20940428      | 21:56830249   | 18:58934639                | 14:93241628                | 17:74045016                | 18:67069091  | 22:19148456      | 23:20907504              | 21:13549602                       |
| 21:16741044      | 17:64525079                    | 11:27613048      | 17:71982798      | 22:17408410   | 21:36694930                | 16:317350                  | 18:13849782                | 18:67707777  | 22:22418774      | 23:21999458              | 22:9694618                        |
| 23:17350602      | 17:68372837                    | 11:28327356      | 18:48410000      | 23:18569445   | 21:38899539                | 16:11078185                | 19:11055859                | 18:68386361  | 22:22992993      | 23:22539658              | 22:10307503                       |
| 23:18569445      | 17:71982798                    | 11:28876865      | 18:49519691      | 23:23217656   | 22:45933595                | 18:68386361                | 19:38427510                | 18:71721918  | 22:25127024      | 23:23217656              | 23:22539658                       |
| 23:21999458      | 19:35083778                    | 11:29807882      | 18:61908546      | 23:25957521   | 23:16006250                | 18:71721918                | 20:27339699                | 21:15989330  | 22:30609948      | 23:24297889              | 23:23217656                       |
| 23:22539658      | 21:21219678                    | 11:53663674      | 21:16741044      | 23:32388178   | 23:21475574                | 19:50757787                | 21:4012633                 | 21:16741044  | 23:11047147      | 23:25446201              | 24:9150902                        |
| 23:23217656      | 21:27358650                    | 17:68938330      | 23:11047147      | 23:43177154   | 23:23217656                | 21:50480673                | 21:38899539                | 21:46398408  | 23:16006250      | 23:25957521              | 24:16590172                       |
| 23:25957521      | 26:20216196                    | 17:73527194      | 23:23217656      | 24:13151827   | 23:32388178                | 22:45933595                | 22:25127024                | 21:55710684  | 23:25446201      | 23:28070897              | 27:6160085                        |
| 28:19413076      | 27:29563839                    | 19:25757994      | 24:19697532      | 28:20020863   | 23:45887213                | 24:42322495                | 22:45933595                | 23:23217656  | 30:11190107      | 24:5118684               | 27:6988402                        |
| 28:25155125      | 29:3725844                     | 27:1487636       | 27:17481989      | 30:6675329    | 24:9816197                 | 25:16325925                | 24:13151827                | 26:22591756  | 31:1539130       | 25:8443219               | 28:14519521                       |

Table S1. (continued)

| Quarter Horse | Saddlebred  | Shetland    | Shire       | Standardbred | Swiss Warmblood | Tennessee Walking Horse | Thoroughbred | Tuva        |
|---------------|-------------|-------------|-------------|--------------|-----------------|-------------------------|--------------|-------------|
| 1:22591693    | 1:83401452  | 1:430799    | 2:61771790  | 1:21985049   | 1:45436375      | 1:168185744             | 1:15239917   | 1:32177494  |
| 2:95092072    | 1:109128149 | 1:934531    | 2:106334223 | 1:29790268   | 1:84592286      | 3:44177551              | 1:40272634   | 2:43598118  |
| 2:95766050    | 1:113120360 | 1:53461842  | 3:34693396  | 2:67726368   | 1:92836057      | 4:11876563              | 1:45436375   | 2:118788077 |
| 3:26513793    | 1:119869331 | 1:82302341  | 3:37227339  | 3:49726446   | 3:84366142      | 5:55356763              | 1:46081981   | 3:13394607  |
| 3:32287917    | 2:3750269   | 1:103110201 | 3:38887583  | 4:84044470   | 4:23652911      | 7:52824872              | 1:84592286   | 3:56554326  |
| 4:19440415    | 2:11658785  | 1:112620338 | 3:41817820  | 5:33930869   | 4:42087018      | 8:20910286              | 1:92836057   | 5:33930869  |
| 6:27427166    | 2:67726368  | 2:100939871 | 3:103690193 | 6:63956814   | 4:86420577      | 8:22290269              | 1:93346091   | 6:63433016  |
| 6:42606288    | 2:95766050  | 3:117494114 | 4:34167967  | 7:16567369   | 5:55978630      | 8:26723937              | 1:112002398  | 7:35056577  |
| 6:63433016    | 3:32287917  | 6:1888178   | 4:34698424  | 7:40438669   | 6:70476841      | 8:29937334              | 1:121570920  | 7:40960230  |
| 9:41547486    | 3:34121799  | 6:7703943   | 5:55356763  | 7:40960230   | 7:36761904      | 8:31754074              | 5:30850033   | 8:37578060  |
| 9:79549429    | 3:37227339  | 6:9835865   | 5:73870324  | 7:46968011   | 8:21733196      | 8:36207838              | 5:55978630   | 8:38106902  |
| 14:41103285   | 3:54594588  | 7:26673944  | 6:70476841  | 7:48559708   | 8:22290269      | 8:37578060              | 6:31481313   | 8:73086390  |
| 14:41872288   | 3:55999074  | 7:39895983  | 7:15834271  | 7:50631496   | 8:22897067      | 8:38106902              | 7:68337139   | 9:71109944  |
| 14:42397287   | 3:75485988  | 7:40960230  | 7:22015718  | 7:51296996   | 8:36207838      | 8:40405825              | 7:75303090   | 11:21512344 |
| 14:58041782   | 5:286327    | 7:46968011  | 7:24355732  | 7:53351032   | 8:37578060      | 8:47557951              | 14:17198854  | 11:31090202 |
| 16:14435298   | 9:53481490  | 7:51296996  | 7:37527086  | 8:32444965   | 8:73086390      | 8:60493821              | 14:20260124  | 13:30444063 |
| 17:22933951   | 10:58572911 | 7:68337139  | 7:40960230  | 8:37578060   | 11:1669995      | 9:2593081               | 14:41872288  | 14:31892985 |
| 18:60847205   | 10:64222554 | 8:38106902  | 7:42049089  | 8:38106902   | 14:42397287     | 9:10737485              | 14:42397287  | 14:78559332 |
| 18:61908546   | 10:76834121 | 10:48168671 | 7:46968011  | 8:40405825   | 15:77364780     | 15:85022973             | 14:47063931  | 15:38794959 |
| 18:64627397   | 10:79930255 | 10:48951340 | 7:66637525  | 8:41601829   | 18:21400451     | 16:33569192             | 17:16147103  | 15:79818862 |
| 18:65193195   | 12:8545630  | 11:28876865 | 8:50256747  | 8:43231982   | 18:37019276     | 16:37535285             | 17:20940428  | 16:38638668 |
| 18:65815128   | 12:15320581 | 11:29807882 | 8:51469702  | 12:11315127  | 18:63790592     | 16:38078175             | 17:22405099  | 17:25572997 |
| 18:66328922   | 13:30444063 | 11:30446632 | 8:52633213  | 13:12323238  | 19:26285985     | 18:69579598             | 17:22933951  | 19:43735342 |
| 18:67069091   | 14:57519927 | 11:36580369 | 11:20394412 | 14:85957119  | 21:15989330     | 19:25255612             | 17:24466631  | 20:28480981 |
| 18:67707777   | 14:58041782 | 15:46809952 | 11:20960864 | 14:87658235  | 21:19539231     | 19:41868862             | 21:15989330  | 21:4012633  |
| 18:68386361   | 15:79818862 | 17:51818831 | 11:23368264 | 18:56676769  | 21:46398408     | 19:50757787             | 21:46398408  | 21:22533915 |
| 18:71721918   | 16:59316879 | 19:35083778 | 11:37690348 | 19:50757787  | 21:55710684     | 21:46398408             | 22:1201562   | 21:29238431 |
| 20:31399502   | 18:45972798 | 22:411052   | 16:25260737 | 20:27339699  | 22:24564251     | 23:23217656             | 22:1702035   | 22:23557811 |
| 21:15989330   | 18:61908546 | 23:15000197 | 17:27194331 | 21:15989330  | 22:41246919     | 26:16943672             | 22:28689582  | 22:45933595 |
| 21:46398408   | 19:14019938 | 24:3772639  | 17:47213263 | 22:37215784  | 23:22539658     | 26:30412647             | 22:29576274  | 23:21999458 |
| 21:55710684   | 21:45756104 | 25:27264247 | 18:67707777 | 23:23217656  | 23:23217656     | 27:34740761             | 24:42322495  | 23:23217656 |
| 23:23217656   | 22:38290820 | 28:22207440 | 21:33947822 | 24:17240120  | 28:42070566     | 27:35244736             | 28:14519521  | 26:35617663 |
| 26:7909378    | 22:44209694 | 29:12346270 | 22:43700089 | 30:12855676  | 30:6675329      | 30:22347030             | 28:45009836  | 27:28498432 |
