# Supplementary material for: Genome-Wide Analysis Reveals Selection for Important Traits in Domestic Horse Breeds
Source: PubMed Central journal article supplement (PMC3547851; doi:10.1371/journal.pgen.1003211), 2013-01-17
Supplement: pgen.1003211.s003.pdf [file pgen.1003211.s003.pdf]

Table S2. Annotated genes (or other features) within high-frequency, extended haplotypes of interest.

| Chromosome, haplotype position, and Breed(s) of interest | Gene or feature  |                                                                        |
|----------------------------------------------------------|------------------|------------------------------------------------------------------------|
| ECA3:105,219,978-105,832,553<br>Belgian                  | LCORL            | ligand dependent nuclear receptor corepressor-like                     |
|                                                          | NCAPG            | non-SMC condensin I complex, subunit G                                 |
|                                                          | DCAF16           | DDB1 and CUL4 associated factor 16                                     |
|                                                          | unknown          | novel transcript                                                       |
|                                                          |                  | novel retrotransposed element                                          |
|                                                          |                  | novel pseudogene                                                       |
| ECA11:23,118,264-23,712,507<br>Draft                     | novel snRNA      | U6 splicosomal RNA                                                     |
|                                                          | PLXDC1           | plexin domain containing 1                                             |
|                                                          | RPL23*           | ribosomal protein L23                                                  |
| ECA11:23,259,732-23,712,507<br>Draft and Miniature       | FBXO47           | F-box protein 47                                                       |
|                                                          | LASP1            | LIM and SH3 protein 1                                                  |
|                                                          | C17orf98         | chromosome 17 open reading frame 98                                    |
|                                                          | CWC25            | CWC25 spliceosome-associated protein homolog                           |
|                                                          | PIP4K2B          | phosphatidylinositol-5-phosphate 4-kinase, type II, beta               |
|                                                          | PSMB3*           | proteasome (prosome, macropain) subunit, beta type, 3                  |
|                                                          | PCGF2            | polycomb group ring finger 2                                           |
|                                                          | CISD3            | CDGSH iron sulfur domain 3                                             |
|                                                          | MLLT6            | myeloid/lymphoid or mixed-lineage leukemia                             |
|                                                          | SRCIN1           | SRC kinase signaling inhibitor 1                                       |
|                                                          | SOCS7            | suppressor of cytokine signaling 7                                     |
|                                                          | GPR179           | G protein-coupled receptor 179                                         |
|                                                          | unknown          | novel transcript                                                       |
| ECA17:20,690,428-23,179,269<br>Thoroughbred              | snoRNA (2)       |                                                                        |
|                                                          | KCNRG            | potassium channel regulator                                            |
|                                                          | TRIM13           | tripartite motif containing 13                                         |
|                                                          | SPRYD7           | SPRY domain containing 7                                               |
|                                                          | KPNA3            | karyopherin alpha 3                                                    |
|                                                          | EBPL             | emopamil binding protein-like                                          |
|                                                          | ARL11*           | ADP-ribosylation factor-like 11                                        |
|                                                          | RCBTB1           | regulator of chromosome condensation & BTB domain containing protein 1 |
|                                                          | PHF11            | PHD finger protein 11                                                  |
|                                                          | SETDB2*          | SET domain, bifurcated 2                                               |
|                                                          | CAB39L           | calcium binding protein 39-like                                        |
|                                                          | CDADC1           | cytidine and dCMP deaminase domain containing 1                        |
|                                                          | FNDC3A           | fibronectin type III domain containing 3A                              |
|                                                          | CYSLTR2          | cysteinyl leukotriene receptor 2                                       |
|                                                          | RCBTB2           | regulator of chromosome condensation & BTB domain containing protein 2 |
|                                                          | RB1              | retinoblastoma 1                                                       |
|                                                          | LPAR6*           | lysophosphatidic acid receptor 6                                       |
|                                                          | ITM2B            | integral membrane protein 2B                                           |
|                                                          | MED4             | mediator complex subunit 4                                             |
|                                                          | NUDT15           | nudix-type motif 15                                                    |
|                                                          | SUCLA2*          | succinate-CoA ligase, ADP-forming, beta subunit                        |
| unknown (3)                                              | novel transcript |                                                                        |
| novel pseudogene (3)                                     |                  |                                                                        |
| microRNA (2)                                             |                  |                                                                        |
| retrotransposed element (2)                              |                  |                                                                        |
| ECA18:66,038,428-66,819,112<br>Quarter Horse and Paint   | SLC40A1          | solute carrier family 40, member 1                                     |
|                                                          | ASNSD1           | asparagine synthetase domain containing 1                              |
|                                                          | ANKAR            | ankyrin and armadillo repeat containing                                |
|                                                          | OSGEPL1          | O-sialoglycoprotein endopeptidase-like 1                               |
|                                                          | ORMDL1           | ORM1-like 1                                                            |
|                                                          | PMS1             | postmeiotic segregation increased 1                                    |
|                                                          | GDF8             | growth/differentiation factor 8 precursor (myostatin)                  |
|                                                          | C2orf88          | chromosome 2 open reading frame 88                                     |
|                                                          | HIBCH            | 3-hydroxyisobutyryl-CoA hydrolase                                      |
|                                                          | INPP1            | inositol polyphosphate-1-phosphatase                                   |
|                                                          | MFSD6            | major facilitator superfamily domain containing 6                      |
|                                                          | novel pseudogene |                                                                        |

\*gene identity predicted from orthologous sequence
