# Supplementary material for: Genome-Wide Analysis Reveals Selection for Important Traits in Domestic Horse Breeds
Source: PubMed Central journal article supplement (PMC3547851; doi:10.1371/journal.pgen.1003211), 2013-01-17
Supplement: pgen.1003211.s004.pdf [file pgen.1003211.s004.pdf]

Table S3. Variants (position and type) identified in sequencing *MSTN* in 6 Thoroughbred and 8 Quarter Horse individuals. The Intron 1 SNP and promoter SINE insertion used in further analyses are noted in bold. A dot (·) indicates missing data while "N" indicates no SINE insertion and "S" indicates the presence of the insertion.

|          | Position (Ecab2.0) | 66489360 | 66489613 | 66490010 | 66490610 | 66491255 | 66491612 | 66492167 | 66493226 | 66493519 | 66493525 | 66493582 | <b>66493737</b> | 66493775 | 66494218 | 66494302 | 66494362 | 66494367 | <b>66495327</b> | 66495696 |
|----------|--------------------|----------|----------|----------|----------|----------|----------|----------|----------|----------|----------|----------|-----------------|----------|----------|----------|----------|----------|-----------------|----------|
|          | Genic Region       | 3' UTR   | 3' UTR   | 3'UTR    | Intron 2 | Intron 2 | Intron 2 | Intron 2 | Intron 1 | Intron 1 | Intron 1 | Intron 1 | <b>Intron 1</b> | Intron 1 | Intron 1 | Intron 1 | Intron 1 | Intron 1 | <b>Promoter</b> | 5' UTR   |
|          | MSTN Primer Pair   | 1        | 1        | 2,3      | 4        | 5        | 6        | 7        | 9        | 10       | 10       | 10       | <b>10</b>       | 10       | 11       | 11       | 11       | 12       | <b>13,14</b>    | 14       |
|          | Reference          | T        | G        | T        | ATC      | A        | A        | A        | TCTTTT   | G        | T        | TG       | <b>T</b>        | A        | A        | A        | G        | G        | <b>NN</b>       | A        |
|          | Variant            | C        | T        | C        | A-C      | G        | G        | G        | T---T    | A        | G        | G        | <b>C</b>        | G        | C        | G        | A        | A        | <b>SS</b>       | G        |
|          | Variant Type       | SNP      | SNP      | SNP      | 1bp del  | SNP      | SNP      | SNP      | 4bp del  | SNP      | SNP      | SNP      | <b>SNP</b>      | SNP      | SNP      | SNP      | SNP      | SNP      | <b>SINE</b>     | SNP      |
| Horse ID | TB1                | TC       | GT       | TT       | ATC      | AA       | AG       | AA       | TCTTTT   | ·        | ·        | ·        | ·               | ·        | AC       | AA       | GG       | GG       | NN              | AA       |
|          | TB2                | CC       | TT       | TT       | ATC      | AA       | GG       | AA       | TCTTTT   | GG       | TT       | TT       | TT              | AA       | CC       | AA       | GG       | GG       | NN              | AA       |
|          | TB3                | TC       | GT       | TT       | ATC      | AA       | AG       | AA       | TCTTTT   | GG       | TT       | TT       | TC              | AA       | AC       | AA       | GG       | GG       | NN              | ·        |
|          | TB4                | ·        | ·        | TT       | ATC      | AA       | AG       | AA       | TCTTTT   | GG       | TT       | TT       | TC              | AA       | AC       | AA       | GG       | GG       | NN              | AA       |
|          | TB5                | TT       | GG       | TT       | ATC      | AA       | AA       | AA       | TCTTTT   | GG       | TT       | TT       | TC              | AA       | AA       | AA       | GG       | GG       | NN              | AA       |
|          | TB6                | CC       | TT       | TT       | ATC      | AA       | GG       | AA       | TCTTTT   | GG       | TT       | TT       | TT              | AA       | CC       | AA       | GG       | GG       | NN              | AA       |
|          | QH1                | TT       | GG       | TT       | ATC      | AA       | AA       | AA       | ·        | GG       | TT       | TT       | CC              | AA       | AA       | AA       | GG       | GG       | SS              | AA       |
|          | QH2                | TT       | GG       | TT       | ATC      | AG       | AA       | AA       | TCTTTT   | GG       | TT       | TT       | TC              | AA       | AA       | AA       | GG       | GG       | NS              | ·        |
|          | QH3                | TT       | GG       | TT       | A-C      | AA       | AA       | AA       | TCTTTT   | GA       | TT       | TT       | TC              | AA       | AA       | AG       | GG       | GG       | NS              | ·        |
|          | QH4                | TT       | GG       | TT       | ATC      | ·        | AA       | AA       | TCTTTT   | GG       | TT       | TT       | TC              | AA       | AA       | AA       | GG       | GG       | NN              | AA       |
|          | QH5                | TT       | GG       | TT       | ATC      | AA       | AA       | AG       | T---T    | GG       | TG       | TG       | TT              | AG       | AA       | AA       | GG       | GG       | NN              | AG       |
|          | QH6                | TC       | GT       | TC       | ATC      | AA       | AG       | AA       | TCTTTT   | GG       | TT       | TT       | TT              | AA       | AC       | AA       | AG       | GA       | NN              | AA       |
|          | QH7                | TT       | GG       | TT       | ATC      | AA       | AA       | AA       | ·        | GG       | TT       | TT       | CC              | AA       | AA       | AA       | GG       | GG       | SS              | ·        |
|          | QH8                | TT       | GG       | TT       | ATC      | AA       | AA       | AA       | ·        | GG       | TT       | TT       | CC              | AA       | AA       | AA       | GG       | GG       | SS              | AA       |
