# Supplementary material for: Genome-Wide Analysis Reveals Selection for Important Traits in Domestic Horse Breeds
Source: PubMed Central journal article supplement (PMC3547851; doi:10.1371/journal.pgen.1003211), 2013-01-17
Supplement: pgen.1003211.s005.pdf [file pgen.1003211.s005.pdf]

Table S4. Primers used for sequencing of *MSTN*.

|          | <b>Primer 1 (5'-3')</b>    | <b>Primer 2 (5'-3')</b> | <b>Source<sup>ω</sup></b> |
|----------|----------------------------|-------------------------|---------------------------|
| MSTN1    | ATAAATGCAATTGTCTCAAAGTC    | CCATATGCAAGTTTCCATTCC   | [20]                      |
| MSTN2    | TCAGCCATTCAGCCTATTTG       | ACGGTTGGCATTTAACCATC    | [20]                      |
| MSTN3    | GGAGACTTGCTTTCATTTACCTG    | GAAGCTTTTGGATGGGATTG    | [20]                      |
| MSTN4    | CTCTGGGGTTTGCTTGGTG        | ACCTAGGGAATGGAGGATGG    | [20]                      |
| MSTN5    | GAAGAGGAGGGAGGGAAGAG       | TTCAGTCTTCATGTGGTCTTGG  | [20]                      |
| MSTN6    | CAAAATCAAAATAGACCTGGTACTTG | TTCATTATTTTGCAGGCTGTTG  |                           |
| MSTN7    | AAGGTATTGTCATCTGCTTGG      | CCAAGACCAGGAGAAGATGG    | [20]                      |
| MSTN8    | GCTTGTTAGCATAGGAACTGG      | CTGAGACCCGTCAAGACTCC    | [20]                      |
| MSTN9    | ATACCAGCGCCTGGGTTC         | GACTGATTGGTACAGCTGCTCA  |                           |
| MSTN10   | TGAAGGAATGAACTGTGGATG      | GTCTGCGATCCTGCTTTACC    | [20]                      |
| MSTN11   | TTTTGAAACTGTTGTGTCCTG      | TCATAATTGCGTTTGGTTGC    | [20]                      |
| MSTN12   | GCAAATGCTCAAATGACCTAAAC    | TGTGCTGATTCTTGCTGGTC    | [20]                      |
| MSTN13   | TGAAGATTTAGTGTTTTGTCTCC    | CGAGATTCATTGTGGAGCAG    | [20]                      |
| MSTN14   | GAGACA ACTTGCCACACCAG      | TGCCCTGGTAATAACAATGAAG  | [20]                      |
| MSTN14a* | TTTAAAAATAGTTCCACATGCAAT   | TGTCGTCAGGATCTATGATTGG  |                           |
| MSTN15   | TTAGGAAGACCTGTATTAAGAGAAG  | CAAAAGGAAAACTGGCAA      |                           |
| MSTN16   | TCTTTCAGGGCATCTGGTTT       | CGTAATAAAGGGGTGCCTGT    |                           |

\* Primer designed to avoid SINE insertion for genotyping of promoter variant in [21]

<sup>ω</sup> If not noted, primer pair was designed for this study
